# Supplementary material for: Community perception of barriers and facilitators to institutional delivery care-seeking behavior in Northwest Ethiopia: a qualitative study
Source: PubMed Central journal article supplement (PMC9487075; doi:10.1186/s12978-022-01497-5), 2022-09-20
Supplement: 12978_2022_1497_MOESM1_ESM.pdf [file 12978_2022_1497_MOESM1_ESM.pdf]

## Title of the manuscript:

**Community perception of barriers and facilitators to institutional delivery care-seeking behavior in North West Ethiopia: a qualitative study**

### Code-book (*Supplementary document 1*)

| Theme                             | Sub-theme                                                           | Code                                              | Code definitions                                                                                                                                      |
|-----------------------------------|---------------------------------------------------------------------|---------------------------------------------------|-------------------------------------------------------------------------------------------------------------------------------------------------------|
| Barrier to institutional delivery | Pregnancy and child birth is normal life event and women's business | Pregnancy is not risk                             | The respondents reported that the community/they/ is not fear about the risk of pregnancy                                                             |
|                                   |                                                                     | Pregnancy and child Birth is the concern of women | The respondents reported that the community/they/ considers pregnancy and child birth is for women ,male has not any concern                          |
|                                   |                                                                     | Pregnancy is normal life                          | The respondents reported that the community/they/ is thinking pregnancy as a normal life                                                              |
|                                   |                                                                     | Child birth is normal life event                  | The respondents reported that the community/they/ is child birth as a normal life                                                                     |
|                                   | Preference of home delivery with TBAs care                          | Home delivery                                     | The respondents reported that the community/they/ prefers delivery at home rather than health institutions ire-regardless of the reason               |
|                                   |                                                                     | Assisted by TBA                                   | The respondents reported that the community/they/ birth at home assisted by TBA                                                                       |
|                                   | Family and cultural influence                                       | Place of delivery decide by women                 | The respondents reported that mostly the place of delivery in the community decided by the women                                                      |
|                                   |                                                                     | Place of delivery decide by family members        | The respondents reported that mostly the place of delivery in the community decided by any family members other than the women                        |
|                                   |                                                                     | Cultural practice at home for labor               | The respondents reported that the community including the women gives emphasis for the cultural practices at home during labor.                       |
|                                   |                                                                     | Home based activity(home management)              | The respondents reported that the community including the women highly burdened by home care activity like feeding the children, oxen, cows, hens.... |
|                                   | Fear of bad behavior of healthcare workers                          | No respecting by the health workers               | The respondents reported that the health care workers at health facility wherever is it showing disrespectful activity for women or their family      |
|                                   |                                                                     | Insulting                                         | The respondents reported that the healthcare workers at health facility insulting the women or any relatives at health facility                       |
|                                   |                                                                     | Being ignorant for greetings                      | No good well coming approach at health facility including the administration staffs at health facility                                                |
|                                   |                                                                     | Less caring behavior                              | No appropriate caring for the women as well as their families                                                                                         |
|                                   |                                                                     | Bad facial expression                             | The facial expression of the health care workers and administrative staffs seems to angry                                                             |
|                                   | Lack of resource                                                    | Shortage of transport fee                         | No enough money for transportation of the women and their families                                                                                    |
|                                   |                                                                     | Lack of waiting home                              | No enough waiting home at health facility for the                                                                                                     |

|                                               |                                                             |                                                         |                                                                                                                    |
|-----------------------------------------------|-------------------------------------------------------------|---------------------------------------------------------|--------------------------------------------------------------------------------------------------------------------|
|                                               |                                                             |                                                         | women including their family                                                                                       |
|                                               |                                                             | Lack of food at health facility                         | No enough food at health facility for the women as well as their families                                          |
|                                               |                                                             | Lack of money                                           | No e money at the hands of women, searching from husbands...                                                       |
| <b>Facilitators to institutional delivery</b> | Free maternal services                                      | Presence of Ambulance                                   | There is ambulance services for pregnant women transportation                                                      |
|                                               |                                                             | Presence of waiting home                                | There is enough waiting home at health facility to stay until labor                                                |
|                                               |                                                             | Free maternity services                                 | All services relating to the pregnancy is free of fee (drug, examination, diagnosis...).                           |
|                                               | Perceived experience of safe child birth at health facility | No-bleeding at health facility                          | Birth at health facility is safe and no worried about the bleeding; it can be easily managed by the health worker. |
|                                               |                                                             | Clean and hygienic service at health facility           | Birth at health facility is hygienic and clean, no contamination, every equipment is safe and free from sharing.   |
|                                               |                                                             | Less pain labour at health facility                     | Labour is much less at health facility, no massage as local..                                                      |
|                                               |                                                             | Birth at health facility is safe for the baby and women | The women and the baby would be safe if the birth is at health facility with the help of health workers.           |
|                                               |                                                             | All services at health facility is free                 | Every services at health facility is free from any cost, no fee for pregnancy and child birth related services     |
|                                               | Women's HDA linkage with HEW                                | Follow-up of pregnant women                             | Following the status of pregnant women with in the specified working village                                       |
|                                               |                                                             | Women HDA discussion                                    | Conducting periodical discussion about the status of the pregnant women with HEW and them selves                   |
|                                               |                                                             | Surveillance of pregnant women                          | Active surveillance of new pregnant women with in the catchment villages                                           |
|                                               |                                                             | Commitment of HDA                                       | Serving the community by taking a sense of ownership                                                               |
|                                               |                                                             | Broad base                                              | Able to standing alone without any incentives to do the capacity building and mobilization of the large community  |
|                                               |                                                             | Communication                                           | Making a smart interpersonal communication with the large community                                                |
