# Supplementary material for: Community perception of barriers and facilitators to institutional delivery care-seeking behavior in Northwest Ethiopia: a qualitative study
Source: PubMed Central journal article supplement (PMC9487075; doi:10.1186/s12978-022-01497-5), 2022-09-20
Supplement: 12978_2022_1497_MOESM2_ESM.pdf [file 12978_2022_1497_MOESM2_ESM.pdf]

## Title of the manuscript:

### Community perception of barriers and facilitators to institutional delivery care-seeking behaviour in Northwest Ethiopia: a qualitative study

The consolidated criteria for reporting qualitative research (COREQ) guidelines  
(*Supplementary document 2*)

| No. Item                                       | Guide questions/description                                                                                                               | Reported on Section                                                                                                                                                                                                                    |
|------------------------------------------------|-------------------------------------------------------------------------------------------------------------------------------------------|----------------------------------------------------------------------------------------------------------------------------------------------------------------------------------------------------------------------------------------|
| <b>Domain 1: Research team and reflexivity</b> |                                                                                                                                           |                                                                                                                                                                                                                                        |
| <i>Personal Characteristics</i>                |                                                                                                                                           |                                                                                                                                                                                                                                        |
| 1. Interviewer/facilitator                     | Which author(s) conducted the Interview or focus group?                                                                                   | Adane Nigusie<br>Telake Azale<br>Mezgebu Yitayal<br>Lemma Derseh                                                                                                                                                                       |
| 2. Credentials                                 | What were the researchers' credentials? E.g. PhD, MD                                                                                      | AN: MPH, PhD candidate<br>TA: PhD<br>MY: PhD<br>LD: PhD                                                                                                                                                                                |
| 3. Occupation                                  | What was their occupation at the time of the study?                                                                                       | AN and TA are researchers in the field of health behaviour and health promotion.<br>MY is researcher in the field of Health Systems and Policy<br>LD is researcher in the field of Epidemiology and Biostatistics                      |
| 4. Gender                                      | Was the researcher male or female?                                                                                                        | All researchers are male.                                                                                                                                                                                                              |
| 5. Experience and training                     | What experience or training did the researchers have?                                                                                     | The researchers have training in qualitative and quantitative research methods in health promotion and public health. All are experienced in research and conducted many researches and published in international reputable journals. |
| <i>Relationship with participants</i>          |                                                                                                                                           |                                                                                                                                                                                                                                        |
| 6. Relationship established                    | Was a relationship established prior to study commencement?                                                                               | No author knew had relationship before the interview it was for the first time during these interviews.                                                                                                                                |
| 7. Participant knowledge of the interviewer    | What did the participants know about the researcher? e.g. personal goals, reasons for doing the research                                  | Participant were informed about the research aims on consent form and information sheet and beside that before starting interview the reason of the research were explained.                                                           |
| 8. Interviewer characteristics                 | What characteristics were reported about the interviewer/facilitator? e.g. Bias, assumptions, reasons and interests in the research topic | Methods ( <i>Method of approach page 8</i> )                                                                                                                                                                                           |
| <b>Domain 2: study design</b>                  |                                                                                                                                           |                                                                                                                                                                                                                                        |
| <i>Theoretical framework</i>                   |                                                                                                                                           |                                                                                                                                                                                                                                        |
| 9. Methodological orientation and Theory       | What methodological orientation was stated to underpin the study? e.g. grounded theory, discourse analysis,                               | Methods ( <i>page 6</i> )                                                                                                                                                                                                              |

|                                        |                                                                                    |                                                      |
|----------------------------------------|------------------------------------------------------------------------------------|------------------------------------------------------|
|                                        | ethnography, phenomenology, content analysis                                       |                                                      |
| <i>Participant selection</i>           |                                                                                    |                                                      |
| 10. Sampling                           | How were participants selected? e.g. purposive, convenience, consecutive, snowball | Methods(Sampling page 7)                             |
| 11. Method of approach                 | How were participants approached? e.g. face-to-face, telephone, mail, email        | Methods ( <i>Method of approach page 8</i> )         |
| 12. Sample size                        | How many participants were in the study?                                           | Methods ( <i>Sample size page 8</i> )                |
| 13. Non-participation                  | How many people refused to participate or dropped out? Reasons?                    | No individuals refused (page 8).                     |
| <i>Setting</i>                         |                                                                                    |                                                      |
| 14. Setting of data collection         | Where was the data collected? e.g. home, clinic, workplace                         | Methods ( <i>Setting of data collection page 9</i> ) |
| 15. Presence of non-participants       | Was anyone else present besides the participants and researchers?                  | No (page 9)                                          |
| 16. Description of sample              | What are the important characteristics of the sample? e.g. demographic data, date  | Methods (Description of sample page 9)               |
| <i>Data collection</i>                 |                                                                                    |                                                      |
| 17. Interview guide                    | Were questions, prompts, guides provided by the authors? Was it pilot tested?      | Methods ( <i>Interview guide page 10</i> )           |
| 18. Repeat interviews                  | Were repeat inter views carried out? If yes, how many?                             | No (page 10)                                         |
| 19. Audio/visual recording             | Did the research use audio or visual recording to collect the data?                | Methods ( <i>Audio recording page 10</i> )           |
| 20. Field notes                        | Were field notes made during and/or after the interview or focus group?            | Methods ( <i>field notes page 10</i> )               |
| 21. Duration                           | What was the duration of the inter views or focus group?                           | Methods ( <i>duration page 10</i> )                  |
| 22. Data saturation                    | Was data saturation discussed?                                                     | Methods ( <i>data saturation page 11</i> )           |
| 23. Transcripts returned               | Were transcripts returned to participants for comment and/or correction?           | No (Page 11)                                         |
| <b>Domain 3: analysis and findings</b> |                                                                                    |                                                      |
| <i>Data analysis</i>                   |                                                                                    |                                                      |
| 24. Number of data coders              | How many data coders coded the data?                                               | Methods ( <i>page 11</i> )                           |
| 25. Description of the coding tree     | Did authors provide a description of the coding tree?                              | Methods(page 12)                                     |
| 26. Derivation of themes               | Were themes identified in advance or derived from the data?                        | Methods (page 12)                                    |
| 27. Software                           | What software, if applicable, was used to manage the data?                         | Methods ( <i>page 12</i> )                           |
| 28. Participant checking               | Did participants provide feedback on the findings?                                 | Methods (page 13)                                    |
| <i>Reporting</i>                       |                                                                                    |                                                      |
| 29. Quotations presented               | Were participant quotations presented to illustrate the themes/findings?           | Results                                              |
| 30. Data and findings consistent       | Was there consistency between the data presented and the findings?                 | Discussion                                           |
| 31. Clarity of major themes            | Were major themes clearly presented in the findings?                               | Results                                              |
| 32. Clarity of minor themes            | Is there a description of diverse cases or discussion of minor themes?             | Results                                              |
